# Supplementary material for: UDP-glucose, cereblon-dependent proinsulin degrader
Source: PubMed Central journal article supplement (PMC9418190; doi:10.1038/s41598-022-18902-5), 2022-08-26
Supplement: 41598_2022_18902_MOESM1_ESM.pdf [file 41598_2022_18902_MOESM1_ESM.pdf]

**Supplemental information for**

**UDP-glucose, cereblon-dependent proinsulin degrader.**

**This pdf file includes:**

Abbreviations

Supplementary Figure S1 to 6

## **Abbreviations**

CRBN, cereblon

CRL4, cullin ring ubiquitin ligase 4

CUL4, cullin 4

DDB1, damage-specific DNA binding protein 1

ER, endoplasmic reticulum

ERAD, ER-associated protein degradation

ERRS, ER-retention signal

GCK, glucokinase

GLUT, glucose transporter

HOMA $\beta$ , homeostatic model assessment of  $\beta$  cells

HRD1, HMG-CoA reductase degradation 1

IC<sub>50</sub>, half maximal (50%) inhibitory concentration

IP, immunoprecipitation

MODY, maturity-onset diabetes of the young

TCA cycle, tricarboxylic acid cycle

UGGT, UDP-glucose:glycoprotein glucosyltransferase

UPR, unfolded protein response

WB, Western blot

WT, wild type

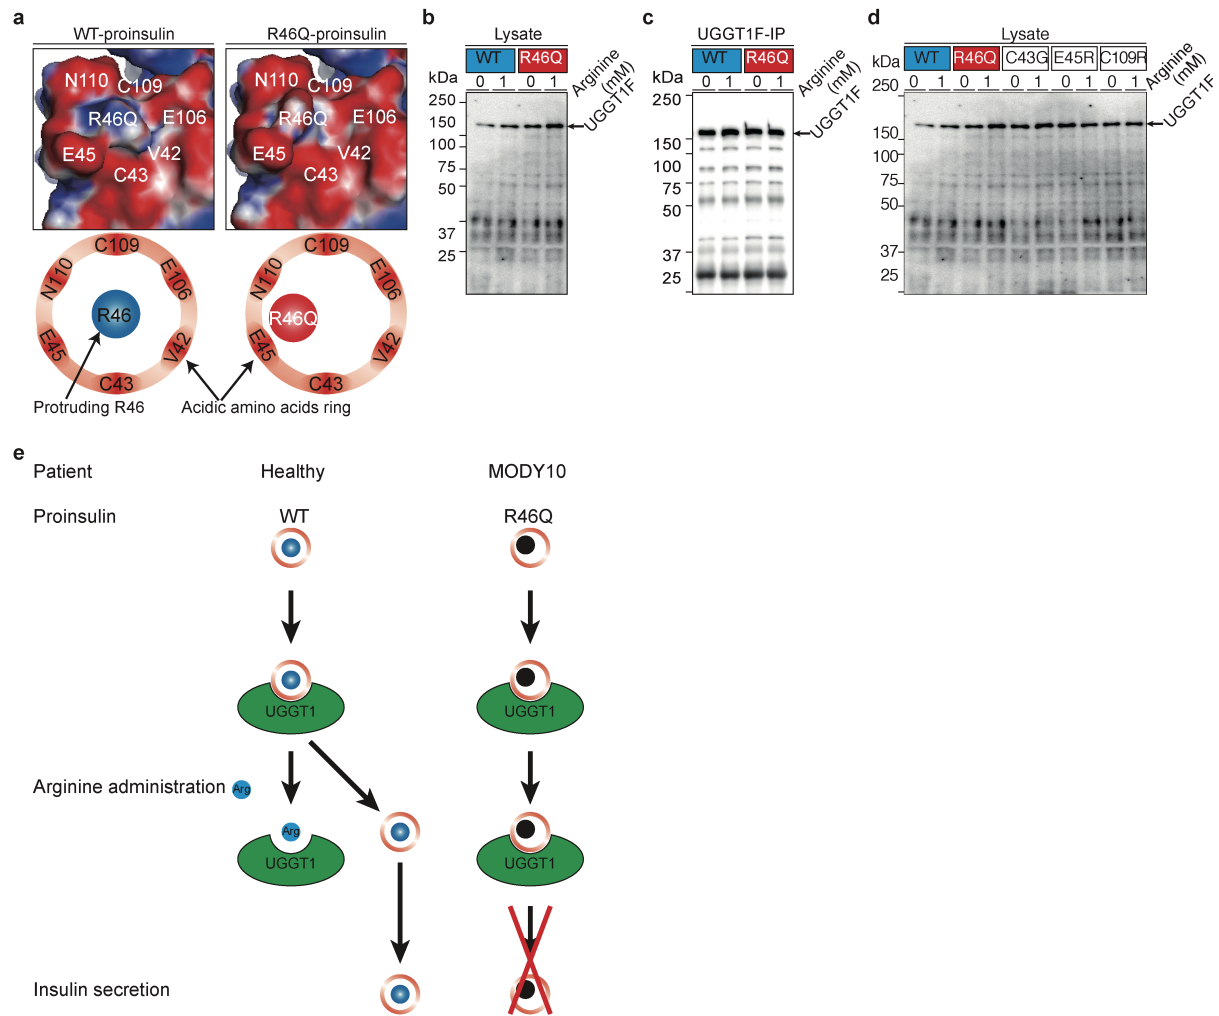

**Supplementary Figure S1. R46 residue of proinsulin is involved in arginine-induced insulin secretion (Supplementary data for Fig. 1).**

(S1a) The predicted structure of R46 (WT) and R46Q proinsulin.

(S1b and c) Intracellular proinsulin and UGGT1 were analyzed by WB (c and Fig. S1b). Proinsulin bound to UGGT1 was assessed by IP of UGGT1 followed by IP-WB (Fig. 1d and Fig. S1c).

(S1d) Proinsulin was immunoprecipitated and blotted for UGGT1 (c, d, Fig. S1b, S1c and S1d).

(S1e) Possible model of arginine-induced R46Q secretion.

WT-insulin binds to UGGT1, and is retained in the ER. Arginine administration releases proinsulin from UGGT1 in a competitive manner.

On the other hands, R46Q proinsulin binds to UGGT1 like WT-proinsulin in the absence of

arginine. Arginine administration has no effect on the R46Q and UGGT1 interaction, leading to less induced R46Q secretion by arginine.



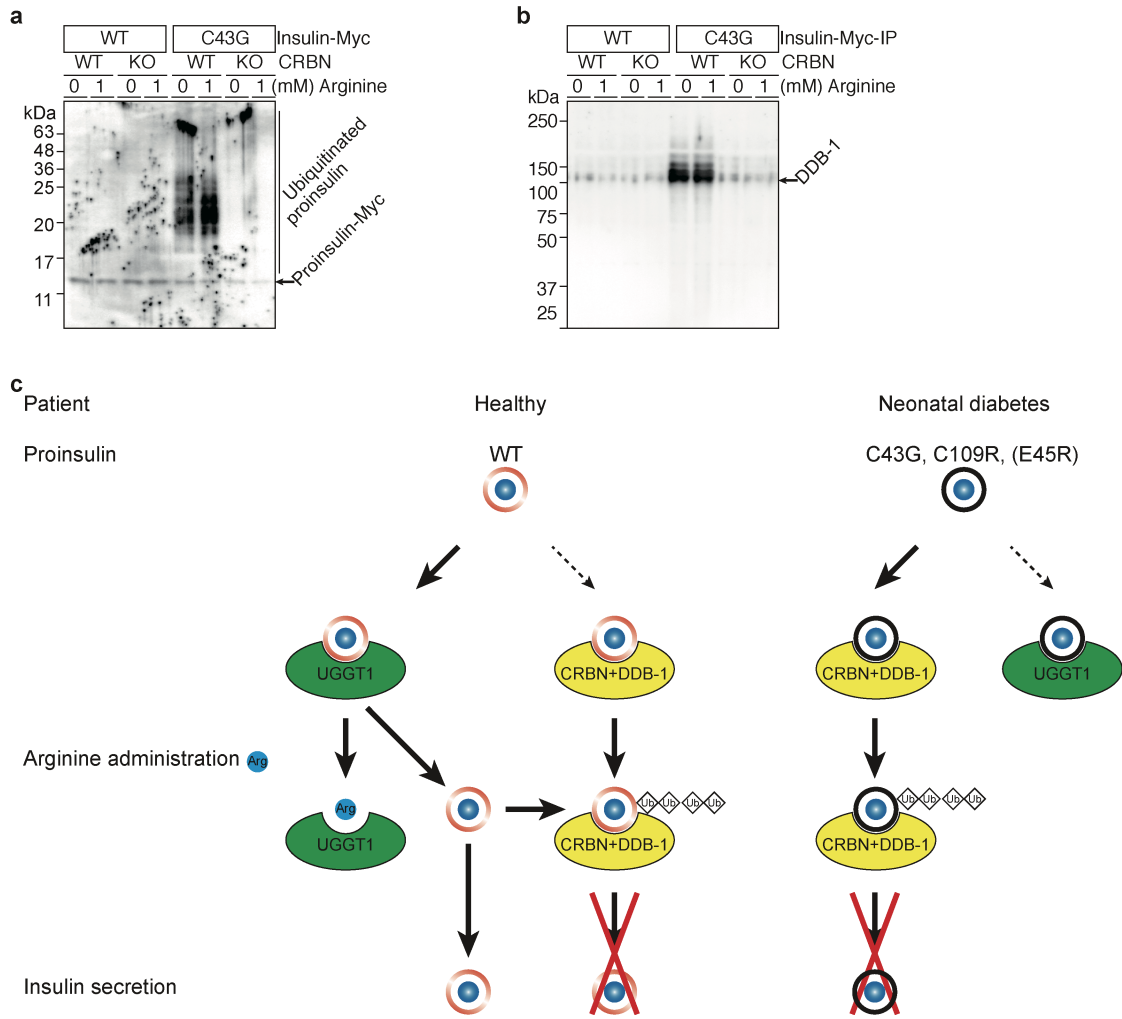

**Supplementary Figure S2. Impaired UGGT1-interaction in C43G-neonatal diabetes variant (Supplementary data for Figure 2).**

(S2a and S2b) Ubiquitination of proinsulin<sup>C43G</sup> protein and association with DDB1 was observed only in CRBN<sup>WT</sup> cells (Fig. 2d, e, Fig. S2a and S2b).

(f) Summary of interaction of insulin (R46Q and C43G variants) with UGGT1 and cereblon in the presence and absence of arginine.

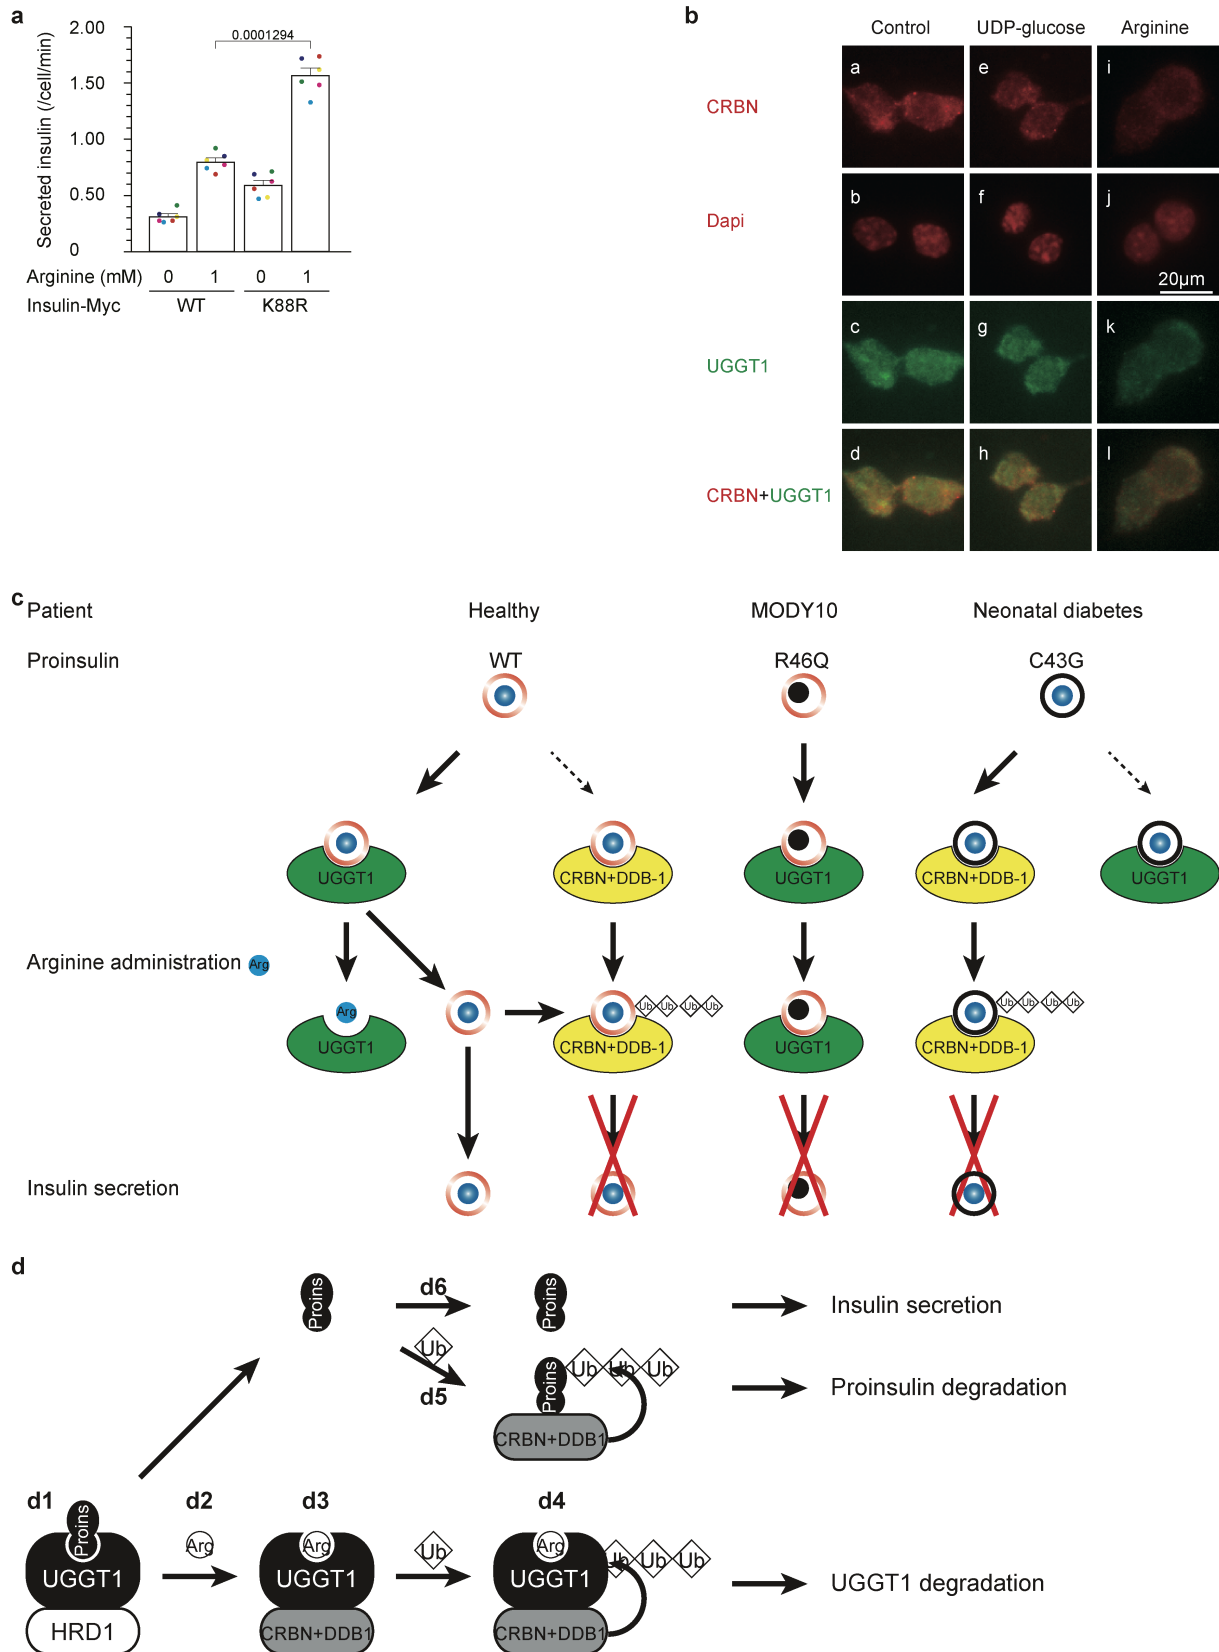

**Supplementary Figure S3. Arginine switches proinsulin associated E3 ubiquitin ligases from HRD1 to cereblon. (Supplementary data for Fig. 3).**

**(S3a)** Higher amount of secreted insulin<sup>K88R</sup> with/without arginine.

**(S3b)** Cereblon co-locates with UGGT1 in the ER. The NIT1 cells treated with control, UDP-glucose, and arginine were visualized with anti-CRBN (red color), Dapi (red color), UGGT1 (green color). Co-localized cereblon and UGGT1 merged into orange color.

**(S3b)** Possible model of arginine-induced WT, R46Q and C43G-insulin secretion.

(Healthy) WT-proinsulin; in the absence or low concentration of arginine, WT-proinsulin binds to UGGT1 mainly. Arginine administration releases proinsulin from UGGT1. Free proinsulin partially binds to cereblon and DDB1 for ubiquitination, and the rest free proinsulin will be secreted.

(MODY10) R46Q-proinsulin; in the absence of arginine R46Q binds to UGGT1, although arginine administration has no effect on the R46Q-UGGT1 interaction, leading less arginine-induced R46Q secretion.

(Neonatal diabetes) C43G-proinsulin; in the absence and presence of arginine C43G binds mainly to CRBN and DDB1 and is ubiquitinated.

**(S3c)** Possible model of arginine-induced insulin secretion with inhibition of proinsulin ubiquitination and degradation.

**(S3d)** Possible model of arginine-induced insulin secretion

(d1) In the absence or low concentration of arginine, proinsulin binds to UGGT1 and HRD1.

(d2) Arginine administration triggers proinsulin releasing from UGGT1 and HRD1 complex.

(d3) Proinsulin-free UGGT1 is also release from HRD1 and binds to arginine, CRBN and DDB1.

(d4) This arginine-UGGT1-CRBN-DDB1 complex leads to UGGT1 ubiquitination.

(d5) A half of free proinsulin binds to CRBN and DDB1 with unknown endogenous ligand X, and is ubiquitinated and degraded.

(d6) The rest half proinsulin is secreted.

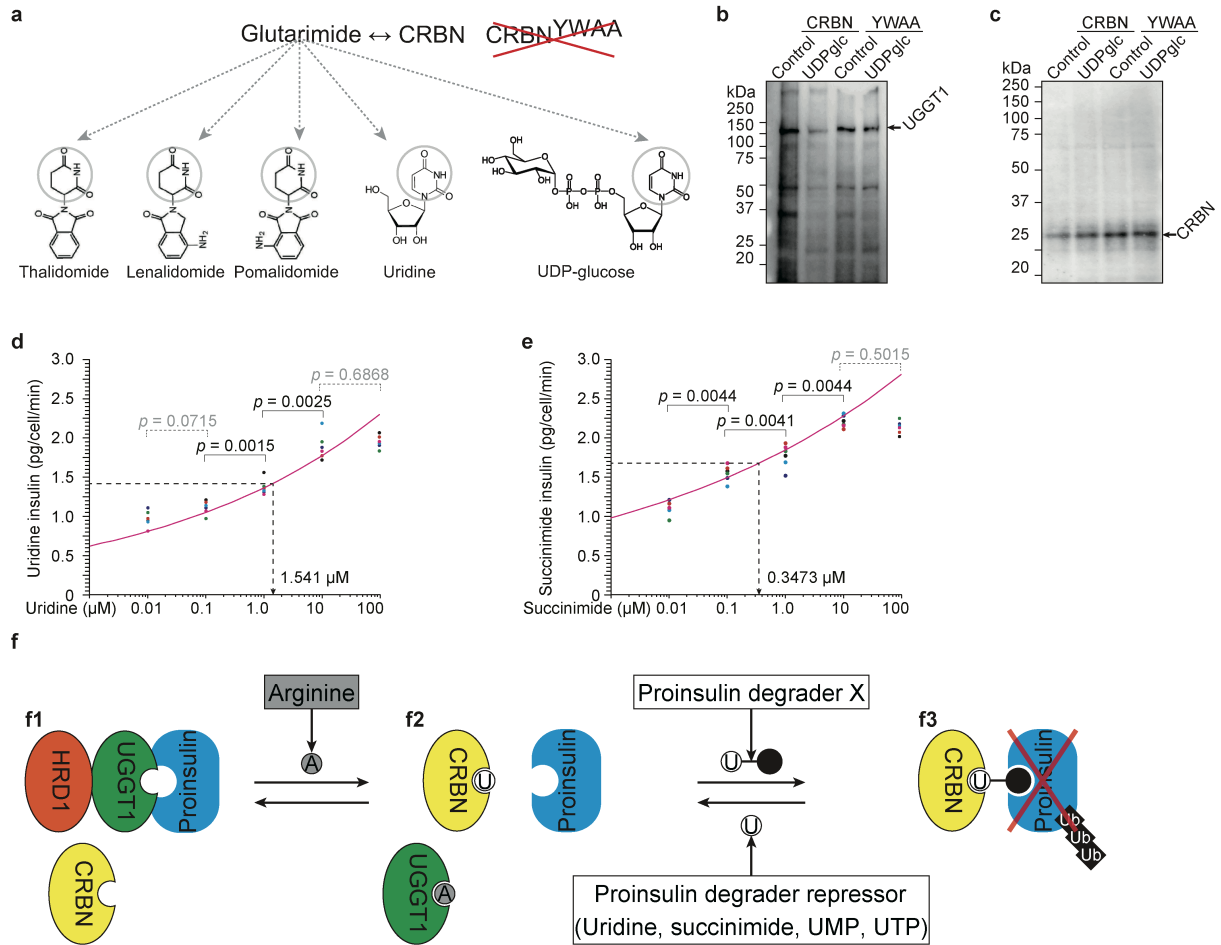

**Supplementary Figure S4. Uridine and succinimide protect proinsulin degradation from cereblon and stimulate insulin secretion from 3h to 24h. (Supplementary data for Fig. 4).**

(S4a) Glutarimide base in IMiDs, uridine and UDP-glucose.

(S4b and c) UDP-glucose and cereblon dependent UGGT1 ubiquitination and degradation, although CRBN<sup>YWAA</sup> mutant was resistant to UDP-glucose dependent UGGT1 ubiquitination and degradation.

(S4d) Uridine stimulates insulin secretion. IC<sub>50</sub> = 1.541 μM

(S4e) Succinimide stimulates insulin secretion. IC<sub>50</sub> = 0.3473 μM

(S4f) Possible model insulin secretion.

(f1) In the absence or low concentration of arginine, proinsulin binds to UGGT1 and HRD1.

(f2) Arginine binds to UGGT1, and proinsulin releases from UGGT1. Uridine binds to cereblon to mask the interaction with proinsulin

(f3) Proinsulin degrading X interacts with cereblon and proinsulin, and proinsulin was

ubiquitinated and degraded.

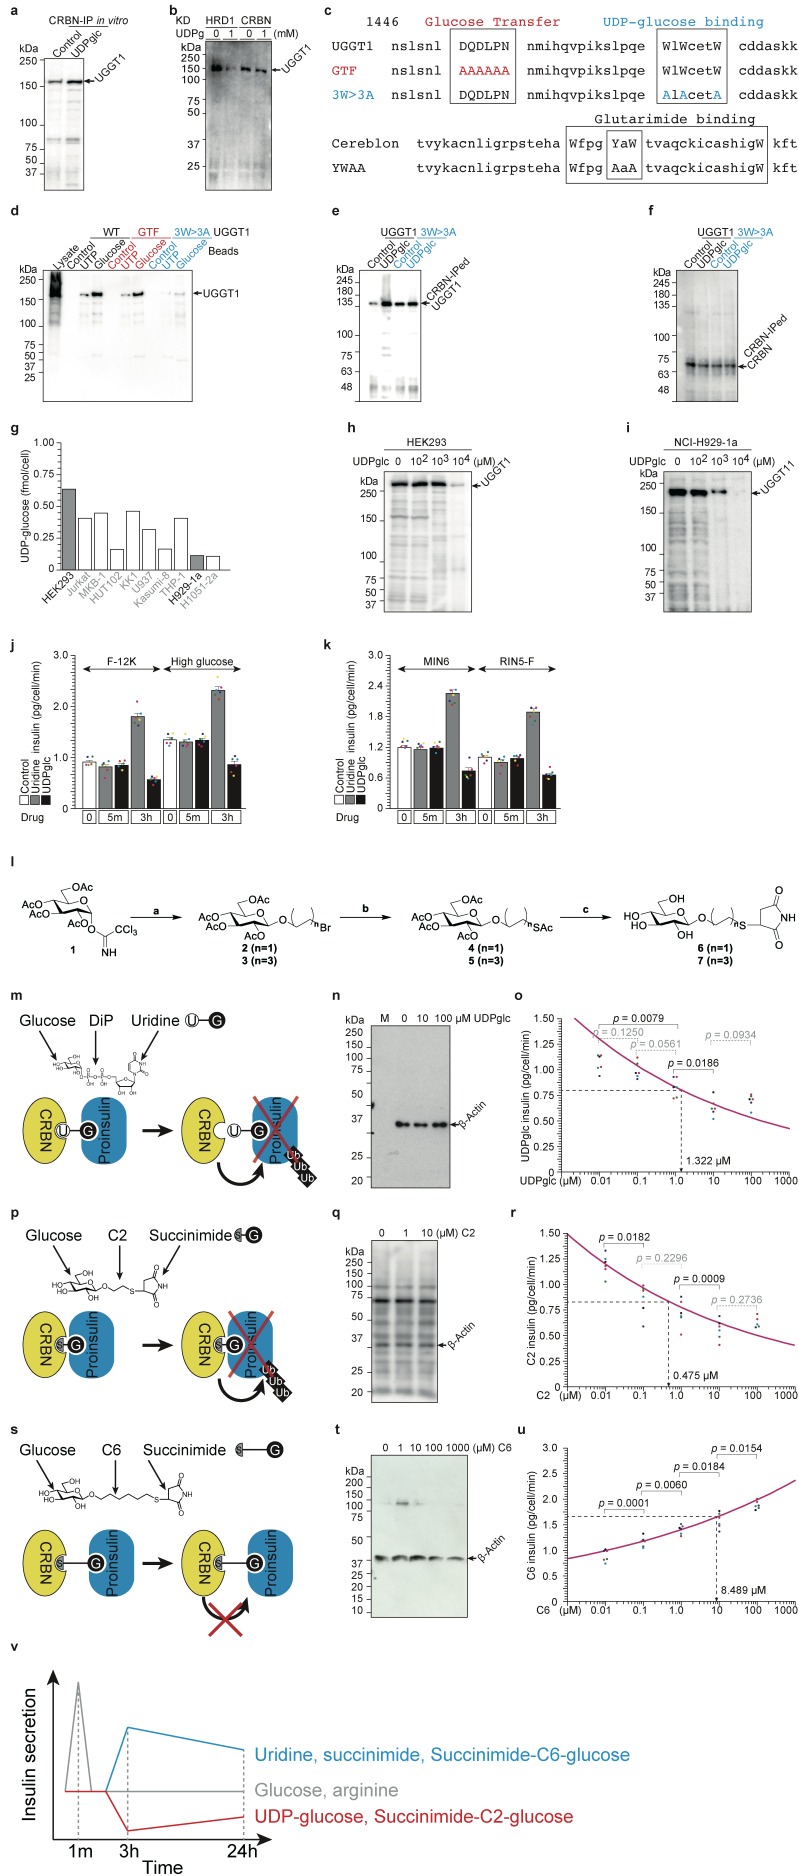

**Supplementary Figure S5. UDP-glucose is endogenous proinsulin protein degrader through cereblon (Supplementary data for Fig. 5).**

**(S5a)** Cereblon bound to UGGT1 directly *in vitro*, and UDP-glucose induced the interaction between cereblon and UGGT1.

**(S5b)** UDP-glucose dependent UGGT1 ubiquitination and degradation was cereblon-dependent manner.

**(S5c)** Protein sequences of two UGGT1 mutant protein of GTF and 3W>3A.

**(S5d)** UGGT1-WT and GTF mutant bound to UTP and glucose, although UGGT1-3W>3A mutant protein did not bind to neither UTP nor glucose.

**(S5e and f)** Both UGGT1<sup>WT</sup> and UGGT1<sup>3W>3A</sup> protein bound to cereblon without UDP-glucose. UDP-glucose administration induced cereblon-interaction of UGGT1<sup>WT</sup>, did not induce that of UGGT1<sup>3W>3A</sup>.

**(S5g-i)** Endogenous UDP-glucose induced UGGT1 degradation. Intracellular endogenous UDP-glucose concentration in various cell lines (**g**). Ten mM UDP-glucose administration induced UGGT1 degradation in HEK293 cells (**h**). One mM UDP-glucose administration induced UGGT1 degradation in NCI-H929-1a cells (**i**).

**(S5j)** Uridine-induced insulin secretion, but UDP-glucose-reduced insulin secretion in F-12K medium with normal (7 mM) or high (24.9 mM) glucose concentration.

**(S5k)** Uridine-induced insulin secretion, but UDP-glucose-reduced insulin secretion in MIN6 and RIN5-F cells.

**(S5l)** Synthesis of glucose conjugated maleimide by thiol–ene click reaction

Synthesis of glucose conjugated maleimide. Reagents and conditions: (a) 2-bromoethanol, BF<sub>3</sub>-Et<sub>2</sub>O, CH<sub>2</sub>Cl<sub>2</sub>, -40 °C, 30 min, 66% (for 2); 6-bromohexanol, BF<sub>3</sub>-Et<sub>2</sub>O, CH<sub>2</sub>Cl<sub>2</sub>, -40 °C, -30 min, -20 °C, 30 min, and then 0 °C, 30 min, 66% (for 3); (b) AcSH, K<sub>2</sub>CO<sub>3</sub>, DMF, r.t., 12 h, 99% (for 4); AcSH, K<sub>2</sub>CO<sub>3</sub>, DMF, r.t., 17.5 h, 83% (for 5); (c) (i) NaOMe–MeOH, r.t., 1 h, (ii) Maleimide, Et<sub>3</sub>N, MeOH, r.t., 1 h, 81 % (for 6); (i) NaOMe–MeOH, r.t., 2.5 h, (ii) Maleimide, Et<sub>3</sub>N, MeOH, r.t., 1 h, 72 % (for 7).

**(S5m-o)** UDP-glucose degrades proinsulin at IC<sub>50</sub> = 1.322 μM

**(S5p-r)** Suciinimide-C2-glucose degrades proinsulin at  $IC_{50} = 0.475 \mu\text{M}$

**(S5s-u)** Suciinimide-C6-glucose protects proinsulin degradation at  $IC_{50} = 8.489 \mu\text{M}$

**(S5v)** Sustainable insulin secretion



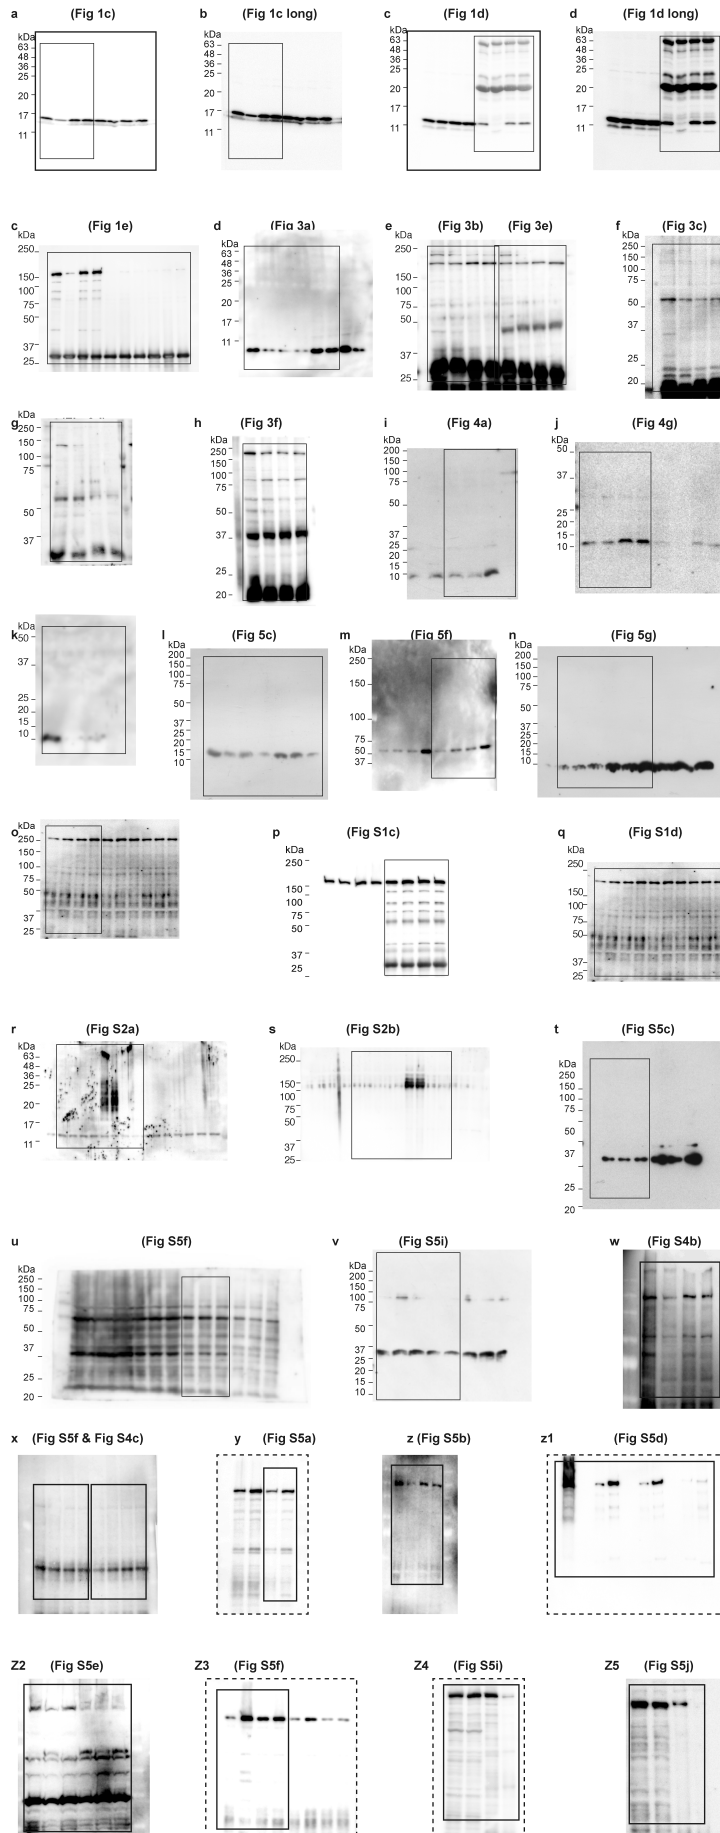

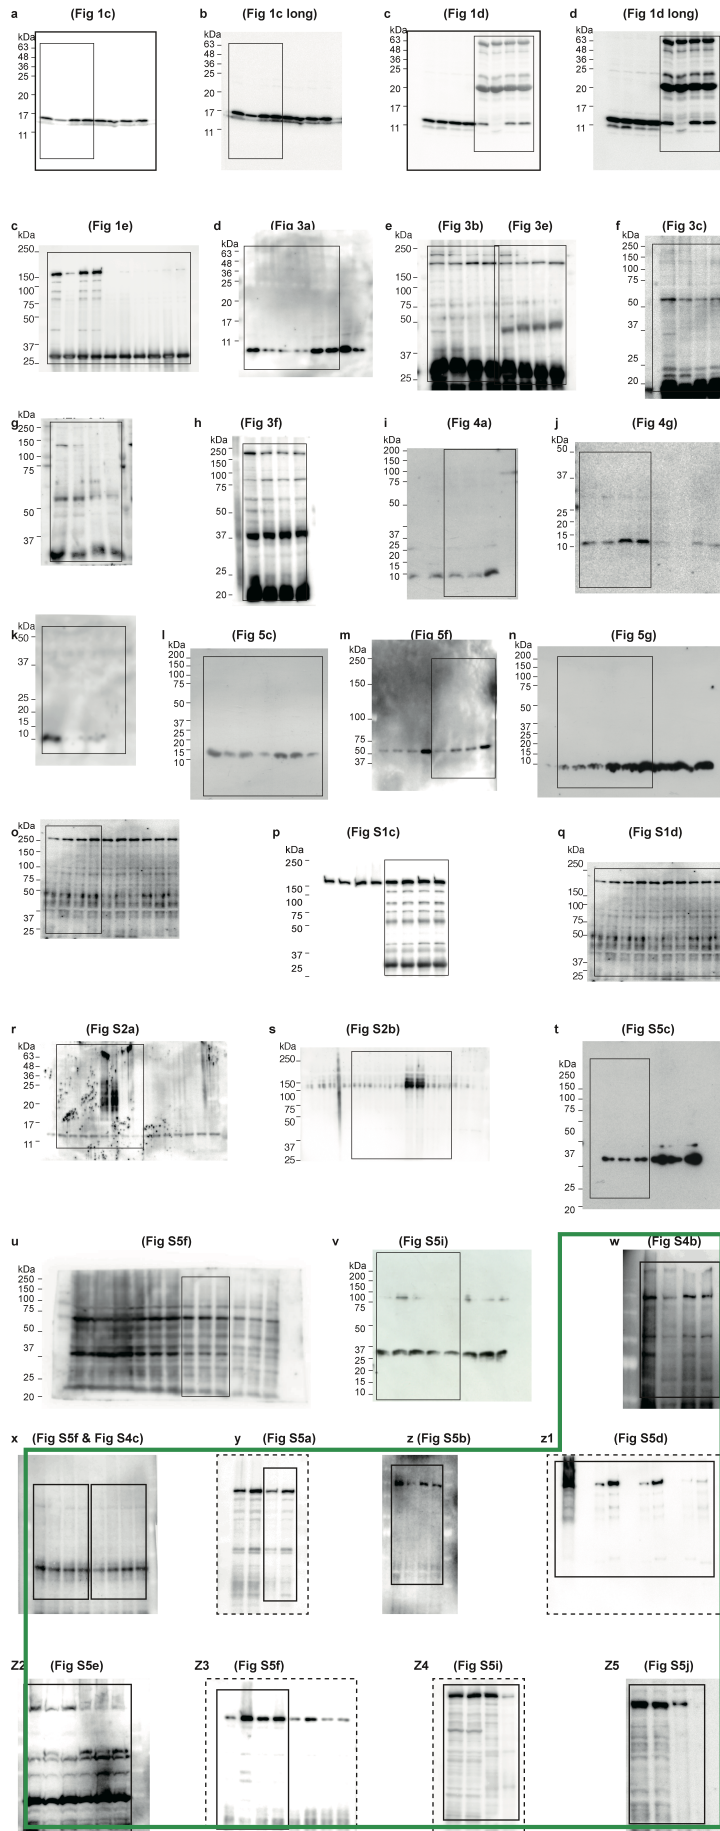

## Figure S6 Source data
